# Supplementary material for: Adipose-specific C-C motif chemokine ligand (CCL) 19 overexpression drives the mice to both insulin resistance and weight gain
Source: PubMed Central journal article supplement — BMJ Open Diabetes Res Care. 2021 May 24;9(1):e001871. doi: 10.1136/bmjdrc-2020-001871 (PMC8149363; doi:10.1136/bmjdrc-2020-001871), 2021-05-24
Supplement: bmjdrc-2020-001871supp001.pdf [file bmjdrc-2020-001871supp001.pdf]

**Supplementary Table 1**

Primer sequences used for real-time PCR

| Gene               | Forward                   | Reverse                  |
|--------------------|---------------------------|--------------------------|
| <i>Ccr7</i>        | CCAGCAAGCAGCTCAACATT      | GCCGATGAAGGCATACAAGA     |
| <i>Mcp1</i>        | AGGTCCCTGTGATGCTTCTG      | TCTGGACCCATTCTTCTTG      |
| <i>Tnfa</i>        | GACAGTGACCTGGACTGTGG      | TGAGACAGAGGCAACCTGAC     |
| <i>Cd11c</i>       | CCTGAGGGTGGGCTGGAT        | GCCAATTCCTCCGGACAT       |
| <i>Il12</i>        | CAGAAGCTAACCATCTCCTGGTTTG | CCGGAGTAATTTGGTGCTCCACAC |
| <i>Adiponectin</i> | TGGATCTGACGACCAAAAA       | CGAATGGGTACATTGGGAAC     |
| <i>F4/80</i>       | CTTTGGCTATGGGCTTCCAGTC    | GCAAGGAGGACAGAGTTTATCGTG |
| <i>Gapdh</i>       | TGACGTGCCGCCTGGAGAAA      | AGTGTAGCCCAAGATGCCCTTCA  |

## Supplementary Figure 1

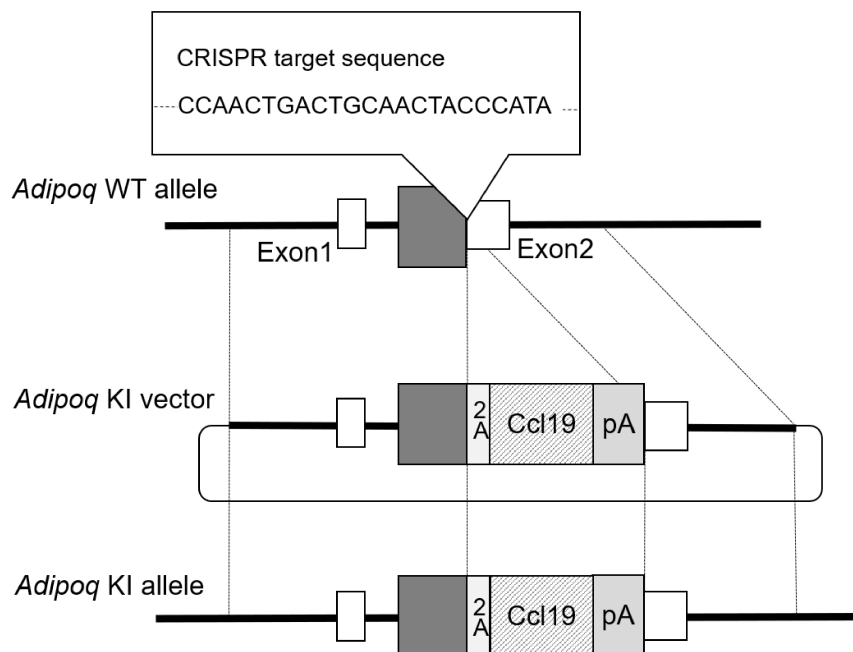

The CRISPR target sequence (5'-CCAACTGACTGCAACTACCCATA-3') was selected for integration of the 2A-Ccl19 sequence just before the stop codon of *Adipoq*. *Adipoq*-CRISPR-F (5'-caccGGGTCTTCGAGAAGACCT-3') and *Adipoq*-CRISPR-R (5'-aacAGGTCTTCTCGAAGACCC-3') were annealed and inserted into the entry site of pX330 as described previously (1). This plasmid was designated as pX330-*Adipoq*. The cleavage activity of pX330-*Adipoq* was confirmed by the traffic reporter system using the p2color vector containing the CRISPR target (2). Transfection to HEK293T cells and fluorescence observations were performed as described (1). CRISPR/Cas9 vector and Knock-in vector for *Adipoq* gene were microinjected into fertilized oocytes.

## References

1. Mizuno S, Dinh TT, Kato K, et al. Simple generation of albino C57BL/6J mice with G291T mutation in the tyrosinase gene by the CRISPR/Cas9 system. *Mamm Genome* 2014;25:327–34.
2. Hasegawa Y, Hoshino Y, Ibrahim AE, et al. Generation of CRISPR/Cas9-mediated bicistronic knock-in ins1-cre driver mice. *Exp Anim* 2016;65:319–27.

Supplementary Figure 2

**A IWAT**

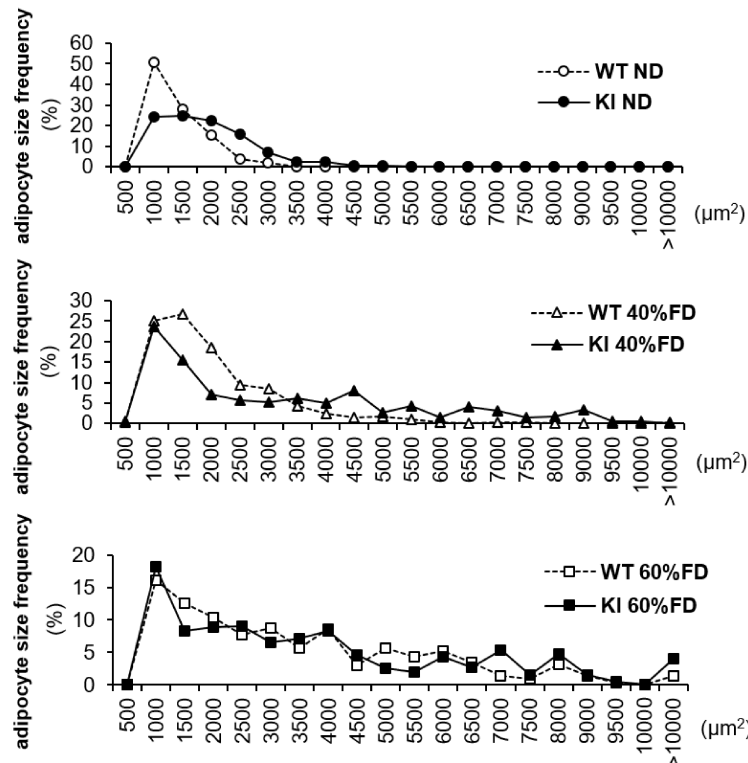

**B eWAT**

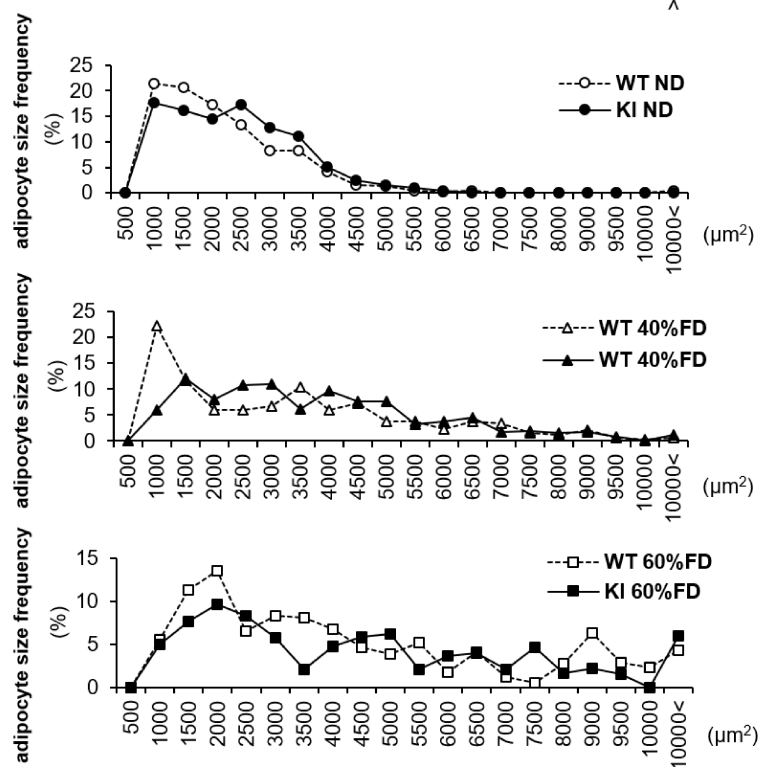

Distribution of adipocytes (based on size) in inguinal white adipose tissue (iWAT) (A), epididymal white adipose tissue (eWAT) (B). All mice were fed with a normal diet (ND) up to 7 weeks after weaning. From 7 weeks of age, mice were fed either ND, a diet containing 40% calories from fat (40%FD), or a diet containing 60% calories from fat (60%FD) for 8 weeks. n = 4 per group, with four random fields per animal.

## Supplementary Figure 3

A

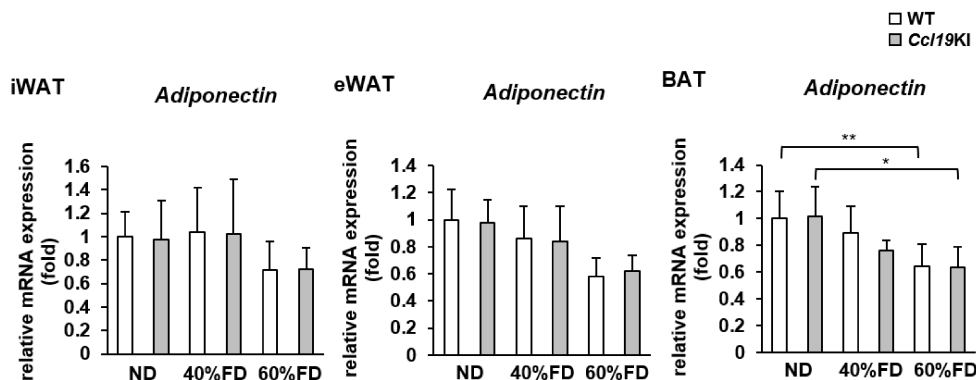

B

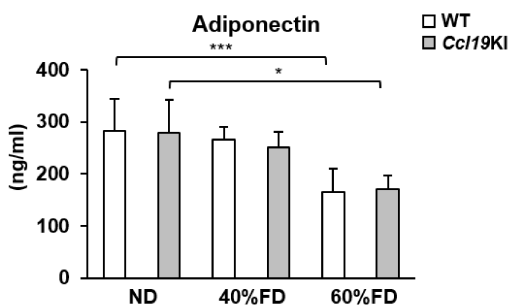

All mice were fed with a normal diet (ND) up to 7 weeks after weaning. From 7 weeks of age, mice were fed an ND, a 40%, or a 60% fat diet (40%FD, 60%FD) for 8 weeks. A) Relative mRNA expression level of *Adiponectin* in iWAT, eWAT, and BAT of WT and *Ccl19KI* mice was measured by RT-PCR. B) Serum Adiponectin concentration was measured by ELISA as described. Data are expressed as mean (SD).  $n=3-5$ . \* $p < 0.05$ , \*\* $p < 0.01$ , \*\*\* $p < 0.001$ . iWAT, inguinal white adipose tissue. eWAT, epididymal white adipose tissue. BAT, interscapular brown adipose tissue.

**Supplementary Figure 4****A iWAT**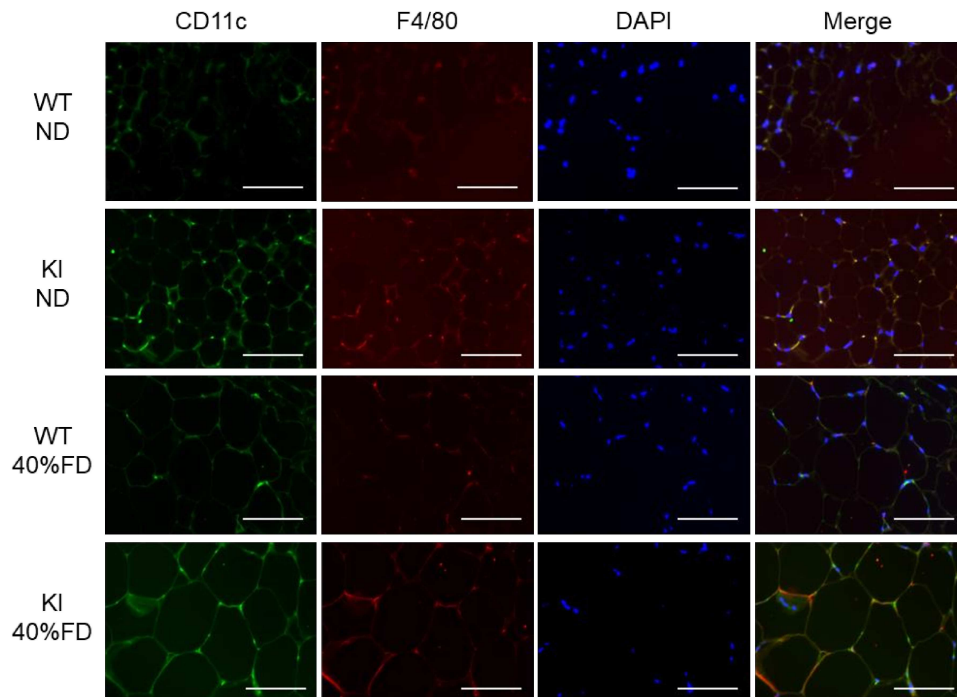**B eWAT**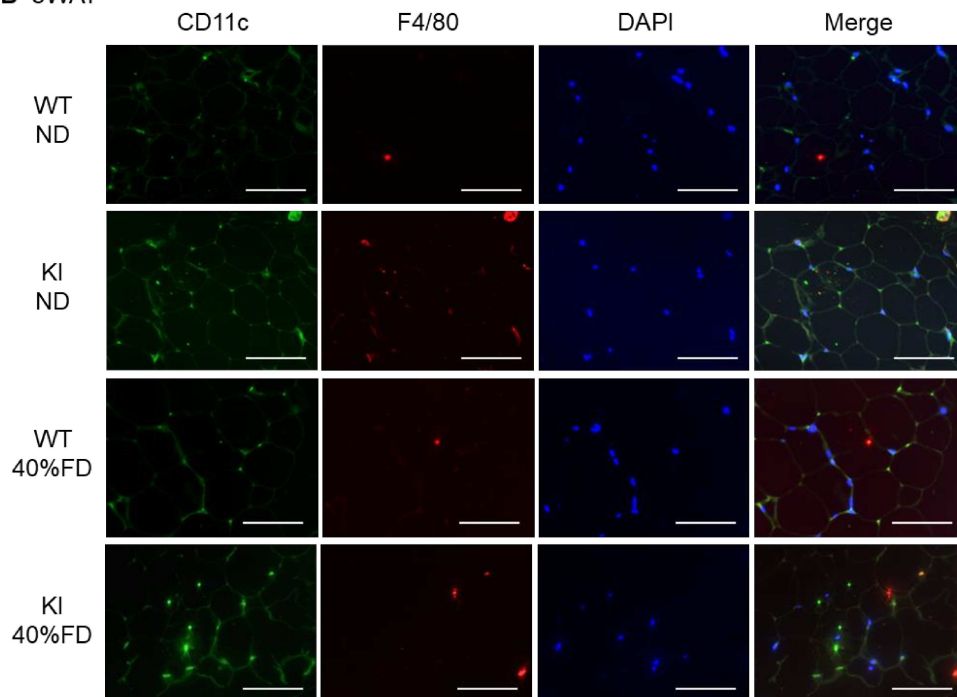

All mice were fed with a normal diet (ND) up to 7 weeks after weaning. From 7 weeks of age, mice were fed an ND or a 40% fat diet (40%FD) for 8 weeks.

A, B) Representative images of immunofluorescence staining for CD11c (green) and F4/80 (red) of iWAT (A) and eWAT (B) are shown. Colocalization (yellow) of CD11c and F4/80 are shown in merged images. Scale bar, 100  $\mu$ m for 40  $\times$  magnification. iWAT, inguinal white adipose tissue. eWAT, epididymal white adipose tissue.

## Supplementary Figure 5

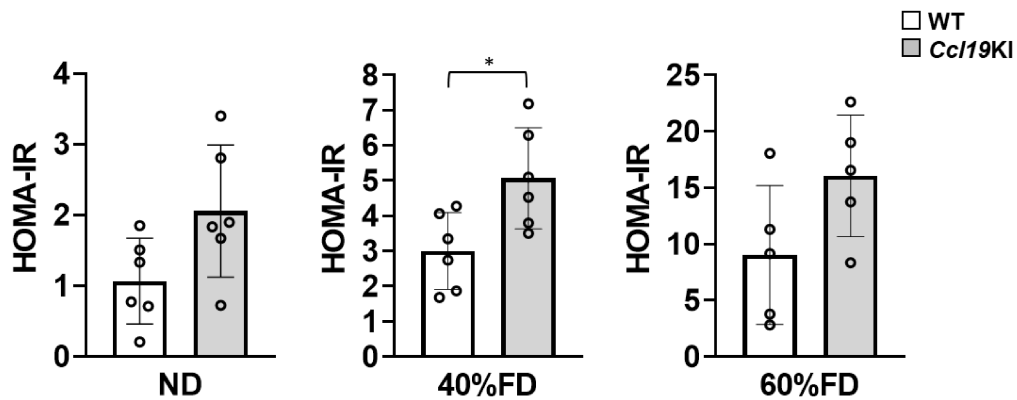

All mice were fed with a normal diet (ND) up to 7 weeks after weaning. From 7 weeks of age, mice were fed an ND, a 40%, or a 60% fat diet (40%FD, 60%FD) for 8 weeks. The HOMA-IR was calculated using the equation  $[(\text{fasting glucose} \times \text{fasting insulin}) / 405]$ .  $n = 4-6$  per group. Data are expressed as mean (SD).  $*p < 0.05$ .
